# Supplementary material for: Development of RisObIn.Com, a Screening Tool for Risk of Childhood Obesity in the Community
Source: MDPI journal article supplement (doi:10.3390/nu12113288), 2020-10-27
Supplement: s1 [file s1]

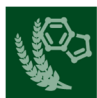

**Table S1.** Variables in the statistical model

| Dimension              | n included in the analysis | Variables                                                                               |                                 | Exp( $\beta$ ) [95% Confidence Interval] | p-value |
|------------------------|----------------------------|-----------------------------------------------------------------------------------------|---------------------------------|------------------------------------------|---------|
| Peri-natal             | 226                        | Pre-pregnancy BMI                                                                       | Pre-pregnancy BMI of Overweight | 2.591 [1.164-5.766]                      | 0.020   |
|                        |                            |                                                                                         | Pre-pregnancy BMI of Obesity    | 4.145 [0.925-8.570]                      | 0.063   |
|                        |                            | Adequacy of weight gain during pregnancy based on Institute of Medicine recommendations |                                 |                                          |         |
|                        |                            | Gestational weeks: term or preterm pregnancy                                            |                                 |                                          |         |
|                        |                            | Diagnosis of gestational diabetes                                                       |                                 |                                          |         |
|                        |                            | Diagnosis of pre-eclampsia                                                              |                                 |                                          |         |
|                        |                            | Smoking during pregnancy                                                                |                                 |                                          |         |
|                        |                            | Information during pregnancy on child SGA                                               |                                 |                                          |         |
|                        |                            | Information during pregnancy on child LGA                                               |                                 |                                          |         |
|                        |                            | Birth BMI                                                                               |                                 |                                          |         |
|                        |                            | Small or Large for gestational age                                                      |                                 |                                          |         |
| Anthropometric         | 141                        | BMI z-score 1-year-old                                                                  |                                 |                                          |         |
|                        |                            | BMI z-score 18-months-old                                                               |                                 |                                          |         |
|                        |                            | BMI z-score 2-years-old                                                                 |                                 |                                          |         |
|                        |                            | BMI z-score 3-years-old                                                                 |                                 |                                          |         |
|                        |                            | BMI z-score 5-years-old                                                                 |                                 | 4.159 [2.404-8.497]                      | 0.000   |
| Sociodemographic       | 138                        | Family type                                                                             |                                 |                                          |         |
|                        |                            | Number of siblings                                                                      |                                 |                                          |         |
|                        |                            | Place of the sibling (only child, older or younger sibling)                             |                                 |                                          |         |
|                        |                            | Maternal nationality                                                                    |                                 |                                          |         |
|                        |                            | Paternal nationality                                                                    |                                 |                                          |         |
|                        |                            | Maternal level of education                                                             |                                 |                                          |         |
|                        |                            | Paternal level of education                                                             |                                 |                                          |         |
|                        |                            | Mean monthly income                                                                     |                                 |                                          |         |
|                        |                            | Parents current employment status                                                       |                                 |                                          |         |
|                        |                            | Maternal BMI                                                                            |                                 |                                          |         |
|                        |                            | Paternal BMI                                                                            | Paternal BMI of Overweight      | 0.772 [0.252-2.364]                      | 0.650   |
|                        |                            |                                                                                         | Paternal BMI of Obesity         | 4.041 [1.271-12.844]                     | 0.018   |
| Previous eating habits | 243                        | Exclusive breastfeeding duration                                                        |                                 |                                          |         |
|                        |                            | Total breastfeeding duration                                                            |                                 |                                          |         |
|                        |                            | Age of solid food introduction                                                          |                                 |                                          |         |

|                       |     |                                                      |                                                                                |                        |       |
|-----------------------|-----|------------------------------------------------------|--------------------------------------------------------------------------------|------------------------|-------|
|                       |     | Type of meal introduced in solid food introduction   | Soup                                                                           | 0.401<br>[0.176-0.914] | 0.030 |
|                       |     | Appetite during solid food introduction              |                                                                                |                        |       |
| Current eating habits | 199 | Child appetite                                       |                                                                                | 0.174<br>[0.050-0.603] | 0.006 |
|                       |     | Caretakers' perception of child intake through image |                                                                                | 1.489<br>[0.985-2.249] | 0.059 |
|                       |     | Child perception of intake through image             |                                                                                |                        |       |
|                       |     |                                                      | Take a fruit or fruit juice every day                                          |                        |       |
|                       |     |                                                      | Has a second fruit every day                                                   |                        |       |
|                       |     |                                                      | Has fresh or cooked vegetables regularly once a day                            |                        |       |
|                       |     |                                                      | Has fresh or cooked vegetables more than once a day                            |                        |       |
|                       |     |                                                      | How many times a week you go to fast-food restaurants or eat pre-cooked meals? |                        |       |
|                       |     |                                                      | For breakfast, most days of the week you eat                                   |                        |       |
|                       |     |                                                      | How many times a week you eat sweets or candy?                                 |                        |       |
|                       |     |                                                      | Total Score of the full KIDMED index                                           |                        |       |
|                       |     | How many times a week you drink soda?                |                                                                                |                        |       |
|                       |     | Family Mediterranean pattern (PREDIMED)              | Do you use olive oil as the main culinary fat?                                 |                        |       |
|                       |     |                                                      | How much olive oil do you consume in a given day                               |                        |       |
|                       |     |                                                      | How many vegetable servings do you                                             | 0.624<br>[0.389-0.999] | 0.050 |

|  |  |  |                                                                                    |                                |              |
|--|--|--|------------------------------------------------------------------------------------|--------------------------------|--------------|
|  |  |  | <b>consume per day?</b>                                                            |                                |              |
|  |  |  | How many fruit units do you consume per day?                                       |                                |              |
|  |  |  | How many servings of red meat, hamburger, or meat products do you consume per day? |                                |              |
|  |  |  | <b>How many servings of butter, margarine, or cream do you consume per day?</b>    | <b>1.535<br/>[0.976-2.413]</b> | <b>0.063</b> |
|  |  |  | How many sweet or carbonated beverages do you drink per day?                       |                                |              |
|  |  |  | How much wine do you drink per week?                                               |                                |              |
|  |  |  | How many servings of legumes do you consume per week?                              |                                |              |
|  |  |  | How many servings of fish or shellfish do you consume per week?                    |                                |              |
|  |  |  | How many times per week do you consume commercial sweets or pastries?              |                                |              |
|  |  |  | How many servings of nuts (including peanuts) do you consume per week?             |                                |              |
|  |  |  | Do you preferentially                                                              |                                |              |

|                                      |     |                                                                                                                          |                                                                                                        |                                  |              |
|--------------------------------------|-----|--------------------------------------------------------------------------------------------------------------------------|--------------------------------------------------------------------------------------------------------|----------------------------------|--------------|
|                                      |     |                                                                                                                          | consume chicken, turkey, or rabbit meat instead of veal, pork, hamburger or sausage?                   |                                  |              |
|                                      |     |                                                                                                                          | How many times per week do you consume vegetables, pasta, rice, or other dishes seasoned with sofrito? |                                  |              |
| Subjective anthropometry perception  | 251 | <b>Adequacy of fathers' body image perception vs. actual BMI</b>                                                         | <b>Relatively correct</b>                                                                              | <b>4.902</b><br>[1.116-21.536]   | <b>0.035</b> |
|                                      |     |                                                                                                                          | <b>Correct</b>                                                                                         | <b>2.597</b><br>[0.634-10.643]   | <b>0.185</b> |
|                                      |     | Adequacy of mother's body image perception vs. actual BMI                                                                |                                                                                                        |                                  |              |
|                                      |     | <b>Adequacy of the caretaker's opinion on the child nutritional status vs. child BMI</b>                                 | <b>Relatively correct</b>                                                                              | <b>3.483</b><br>[0.882-13.753]   | <b>0.075</b> |
|                                      |     |                                                                                                                          | <b>Correct</b>                                                                                         | <b>31.605</b><br>[6.055-164.951] | <b>0.000</b> |
|                                      |     | Adequacy of the caretaker's body image perception of the child vs. child BMI                                             |                                                                                                        |                                  |              |
|                                      |     | Adequacy of the child body image perception vs. actual BMI                                                               |                                                                                                        |                                  |              |
| Subjective eating habits perception  | 256 | <b>Caretaker's perception regarding child intake when anxious</b>                                                        | <b>No</b>                                                                                              | <b>0.260</b><br>[0.056-1.204]    | <b>0.085</b> |
|                                      |     | Child perception regarding intake when anxious                                                                           |                                                                                                        |                                  |              |
|                                      |     | Difference between child perception of intake through image and caretakers' perception of the child intake through image |                                                                                                        |                                  |              |
|                                      |     | <b>Caretakers' perception of the adequacy of the child food intake for age</b>                                           | <b>Inferior or adequate</b>                                                                            | <b>0.083</b><br>[0.024-0.286]    | <b>0.000</b> |
|                                      |     | Adequacy of food intake for height                                                                                       |                                                                                                        |                                  |              |
| Physical activity and hours of sleep | 91  | <b>Child participation in programmed sport activity</b>                                                                  | <b>Yes</b>                                                                                             | <b>0.194</b><br>[0.052-0.724]    | <b>0.015</b> |
|                                      |     | Consumption of meals in front of a screen                                                                                |                                                                                                        |                                  |              |
|                                      |     | Consumption of meals in front of a screen: How many times a week?                                                        |                                                                                                        |                                  |              |

|  |  |                              |  |  |
|--|--|------------------------------|--|--|
|  |  | Hours of sleep, weekdays     |  |  |
|  |  | Hours of sleep, weekend days |  |  |
|  |  | Hours of sleep, mean         |  |  |

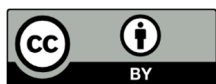

© 2020 by the authors. Licensee MDPI, Basel, Switzerland. This article is an open access article distributed under the terms and conditions of the Creative Commons Attribution (CC BY) license (<http://creativecommons.org/licenses/by/4.0/>).
